# Supplementary material for: Extended KAFR: A kinematic-adaptive paradigm for the efficient analysis of surgical video
Source: Research Square preprint supplement (doi:10.21203/rs.3.rs-8866826/v1), 2026-02-24
Supplement: Supplementary file 1 [file 99b9e49484dc1436a7faca84.xlsx]

## Sheet: Authors
	KAFR: A kinematic-adaptive paradigm for the efficient analysis of surgical video
	HUU PHONG NGUYEN1 , SHEKHAR MADHAV KHAIRNAR1 , GANESH SANKARANARAYANAN1
	1Department of Surgery, University of Texas Southwestern Medical Center, Texas, USA

## Sheet: Results
					no relax				relax									no relax				relax									no relax				relax									no relax				relax
		method	portion	w	Acc	Precision	Recall	F1	Acc	Precision	Recall	F1			method	portion	w	Acc	Precision	Recall	F1	Acc	Precision	Recall	F1			method	portion	w	Acc	Precision	Recall	F1	Acc	Precision	Recall	F1			method	portion	w	Acc	Precision	Recall	F1	Acc	Precision
	s1	adaptive 1	0.5	31	84.64	79	86	82.01	87.49	85	91	87.54		s1	adaptive 1	0.5	31	86.36	80	86	82.43	89.35	86	91	88.23		s1	adaptive 1	0.5	31	85.5	79.5	86	82.22	88.42	85.5	91	87.885		s1	adaptive 1	0.5	31	1.21622	0.707107	0	0.296985	1.31522	0.707107
				63	85.46	81	86	83.05	88.4	87	91	88.69					63	87.09	81	86	83.22	90.13	87	91	89.16					63	86.275	81	86	83.135	89.265	87	91	88.925					63	1.15258	0	0	0.120208	1.22329	0
				127	85.28	80	83	81.08	88.97	88	90	88.51					127	86.28	80	83	80.78	90.19	88	90	88.57					127	85.78	80	83	80.93	89.58	88	90	88.54					127	0.707107	0	0	0.212132	0.86267	0
				best	85.52	80.76	84.7	82.3	88.85	87.53	90.59	88.85					best	87.05	80.92	85.97	83.13	90.19	87.43	91.16	89.18					best	86.285	80.84	85.335	82.715	89.52	87.48	90.875	89.015					best	1.08187	0.113137	0.898026	0.586899	0.947523	0.0707107
			0.3	31	87.41	80	87	82.92	90.23	86	92	88.35				0.3	31	85.71	79	87	81.83	88.91	85	92	87.49				0.3	31	86.56	79.5	87	82.375	89.57	85.5	92	87.92				0.3	31	1.20208	0.707107	0	0.770746	0.933381	0.707107
				63	88.27	82	87	84.36	91.12	88	92	89.91					63	87.13	81	88	83.9	90.26	87	92	89.28					63	87.7	81.5	87.5	84.13	90.69	87.5	92	89.595					63	0.806102	0.707107	0.707107	0.325269	0.608112	0.707107
				127	87.82	81	84	82.11	91.58	89	89	89.98					127	86.9	81	85	82.01	90.84	88	91	89.07					127	87.36	81	84.5	82.06	91.21	88.5	90	89.525					127	0.650538	0	0.707107	0.0707107	0.523259	0.707107
				best	88.36	81.88	85.82	83.57	91.69	89.06	91.95	90.41					best	87.27	81.41	87.63	83.69	90.59	87.6	92.32	89.49					best	87.815	81.645	86.725	83.63	91.14	88.33	92.135	89.95					best	0.770746	0.33234	1.27986	0.0848528	0.777817	1.03238
			0.1	31	87.25	81	87	83.52	90.1	87	91	88.81				0.1	31	85.92	81	85	82.36	88.95	86	90	87.94				0.1	31	86.585	81	86	82.94	89.525	86.5	90.5	88.375				0.1	31	0.940452	0	1.41421	0.820244	0.813173	0.707107
				63	87.97	83	88	84.93	91.04	89	92	90.49					63	86.7	83	86	83.61	89.83	89	91	89.2					63	87.335	83	87	84.27	90.435	89	91.5	89.845					63	0.898026	0	1.41421	0.933381	0.855599	0
				127	87.78	82	85	82.9	91.86	90	91	90.77					127	85.94	82	82	81.01	89.81	88	89	88.38					127	86.86	82	83.5	81.955	90.835	89	90	89.575					127	1.30108	0	2.12132	1.33643	1.44957	1.41421
				best	88.29	82.86	87.48	84.89	91.71	90.04	92.64	91.26					best	86.72	83.08	85.81	83.73	89.89	88.37	90.9	89.32					best	87.505	82.97	86.645	84.31	90.8	89.205	91.77	90.29					best	1.11016	0.155563	1.18087	0.820244	1.28693	1.18087
			0.05	31	85.99	82	86	82.55	89.04	85	91	87.77				0.05	31	85.85	79	84	81.31	88.72	85	89	86.89				0.05	31	85.92	80.5	85	81.93	88.88	85	90	87.33				0.05	31	0.0989949	2.12132	1.41421	0.876812	0.226274	0
				63	87	82	87	83.79	90.07	87	91	89.22					63	86.63	81	84	82.29	89.6	87	90	88.18					63	86.815	81.5	85.5	83.04	89.835	87	90.5	88.7					63	0.26163	0.707107	2.12132	1.06066	0.33234	0
				127	86.54	81	84	82.05	90.49	89	90	89.29					127	86.4	80	82	80.45	90.24	88	89	88.44					127	86.47	80.5	83	81.25	90.365	88.5	89.5	88.865					127	0.0989949	0.707107	1.41421	1.13137	0.176777	0.707107
				best	87.15	82.01	86.56	83.81	90.43	88.17	91.27	89.58					best	87.03	81.44	84.01	82.32	90.28	88.35	89.84	88.94					best	87.09	81.725	85.285	83.065	90.355	88.26	90.555	89.26					best	0.0848528	0.403051	1.80312	1.05359	0.106066	0.127279
		adaptive 2	0.1	31	86.73	81	87	83.76	89.33	87	91	88.98			adaptive 2	0.1	31	86.23	80	86	82.77	89.26	86	91	86.41			adaptive 2	0.1	31	86.48	80.5	86.5	83.265	89.295	86.5	91	87.695			adaptive 2	0.1	31	0.353553	0.707107	0.707107	0.700036	0.0494975	0.707107
				63	87.67	83	87	84.88	90.4	89	92	90.23					63	86.8	82	87	83.56	89.98	88	92	89.48					63	87.235	82.5	87	84.22	90.19	88.5	92	89.855					63	0.615183	0.707107	0	0.933381	0.296985	0.707107
				127	87.36	83	84	83.19	90.83	90	90	90.23					127	86.71	81	84	81.9	90.71	89	91	89.65					127	87.035	82	84	82.545	90.77	89.5	90.5	89.94					127	0.459619	1.41421	0	0.912168	0.0848528	0.707107
				best	87.78	83.5	86.08	84.56	90.92	90.52	91.29	90.81					best	86.99	81.79	84.94	82.67	90.76	88.99	91.14	89.88					best	87.385	82.645	85.51	83.615	90.84	89.755	91.215	90.345					best	0.558614	1.20915	0.806102	1.33643	0.113137	1.08187
	s2	adaptive 1	0.5	31	86.46	80	86	82.66	89.34	86	91	88.29		s2	adaptive 1	0.5	31	87.47	83	81	81.17	90.3	89	89	88.95		s2	adaptive 1	0.5	31	86.965	81.5	83.5	81.915	89.82	87.5	90	88.62		s2	adaptive 1	0.5	31	0.714178	2.12132	3.53553	1.05359	0.678823	2.12132
				63	87.25	82	86	83.7	90.22	88	91	89.48					63	88.26	85	81	81.91	91.06	91	89	89.87					63	87.755	83.5	83.5	82.805	90.64	89.5	90	89.675					63	0.714178	2.12132	3.53553	1.26572	0.59397	2.12132
				127	86.78	81	83	81.35	90.4	89	89	88.79					127	87.77	84	78	79.15	91.5	92	88	89.83					127	87.275	82.5	80.5	80.25	90.95	90.5	88.5	89.31					127	0.700036	2.12132	3.53553	1.55563	0.777817	2.12132
				best	87.59	82.21	85.89	83.78	90.69	89.08	90.99	89.94					best	88.3	85.16	80.38	81.01	92.53	92.03	88.91	90.17					best	87.945	83.685	83.135	82.395	91.61	90.555	89.95	90.055					best	0.502046	2.08597	3.89616	1.95869	1.30108	2.08597
			0.4	31	88.02	83	87	84.65	90.75	89	91	90.25				0.4	31	87.07	81	86	83.31	90.17	88	92	89.48				0.4	31	87.545	82	86.5	83.98	90.46	88.5	91.5	89.865				0.4	31	0.671751	1.41421	0.707107	0.947523	0.410122	0.707107
				63	88.74	84	86	85.39	91.53	91	91	91.14					63	88	83	87	84.42	90.99	89	92	90.35					63	88.37	83.5	86.5	84.905	91.26	90	91.5	90.745					63	0.523259	0.707107	0.707107	0.685894	0.381838	1.41421
				127	88.74	84	84	83.9	92.01	92	90	90.98					127	88.07	83	85	83.22	91.69	91	91	90.63					127	88.405	83.5	84.5	83.56	91.85	91.5	90.5	90.805					127	0.473762	0.707107	0.707107	0.480833	0.226274	0.707107
				best	89.11	85.1	86.76	85.84	91.92	91.68	91.67	91.64					best	88.4	83.7	86.86	84.97	91.43	90.3	91.8	90.96					best	88.755	84.4	86.81	85.405	91.675	90.99	91.735	91.3					best	0.502046	0.989949	0.0707107	0.615183	0.346482	0.975807
			0.3	31	86.44	80	86	82.49	89.25	86	91	87.78				0.3	31	87.08	80	86	82.95	89.93	87	91	88.66				0.3	31	86.76	80	86	82.72	89.59	86.5	91	88.22				0.3	31	0.452548	0	0	0.325269	0.480833	0.707107
				63	87.35	82	86	83.89	90.16	88	91	89.14					63	87.84	82	87	84.12	90.8	88	92	89.98					63	87.595	82	86.5	84.005	90.48	88	91.5	89.56					63	0.346482	0	0.707107	0.162635	0.452548	0
				127	87.04	81	83	81.82	90.76	89	90	89.35					127	87.45	81	84	82.18	91.17	89	91	89.78					127	87.245	81	83.5	82	90.965	89	90.5	89.565					127	0.289914	0	0.707107	0.254558	0.289914	0
				best	87.54	82.31	85.92	83.84	90.64	88.48	91.23	89.74					best	87.96	82.19	86.72	84.2	90.95	88.85	91.68	90.12					best	87.75	82.25	86.32	84.02	90.795	88.665	91.455	89.93					best	0.296985	0.0848528	0.565685	0.254558	0.219203	0.26163
			0.2	31	85.5	80	86	82.29	88.54	86	91	88.03				0.2	31	84.86	80	86	82.21	87.76	80	86	87.5				0.2	31	85.18	80	86	82.25	88.15	83	88.5	87.765				0.2	31	0.452548	0	0	0.0565685	0.551543	4.24264
				63	86.45	82	87	83.94	89.55	88	92	89.73					63	85.76	82	87	83.69	88.71	87	91	88.94					63	86.105	82	87	83.815	89.13	87.5	91.5	89.335					63	0.487904	0	0	0.176777	0.59397	0.707107
				127	85.7	81	84	81.79	89.59	89	90	89.37					127	85.48	81	82	81.01	89.49	88	90	88.85					127	85.59	81	83	81.4	89.54	88.5	90	89.11					127	0.155563	0	1.41421	0.551543	0.0707107	0.707107
				best	86.69	82.09	86.73	84.04	89.92	88.72	91.86	90.09					best	85.93	81.79	86.42	83.49	89.05	87.64	91.3	89.16					best	86.31	81.94	86.575	83.765	89.485	88.18	91.58	89.625					best	0.537401	0.212132	0.219203	0.388909	0.615183	0.763675
			0.1	31	85.57	78	86	81.4	88.8	84	91	87.24				0.1	31	86.74	80	86	82.84	89.37	86	90	88.07				0.1	31	86.155	79	86	82.12	89.085	85	90.5	87.655				0.1	31	0.827315	1.41421	0	1.01823	0.403051	1.41421
				63	86.55	80	87	83.11	89.75	86	92	88.81					63	87.92	83	87	84.99	90.57	89	92	90.28					63	87.235	81.5	87	84.05	90.16	87.5	92	89.545					63	0.968736	2.12132	0	1.32936	0.579828	2.12132
				127	86.99	80	84	81.37	91.11	88	91	89.28					127	87.65	82	83	82.34	91.13	90	90	89.87					127	87.32	81	83.5	81.855	91.12	89	90.5	89.575					127	0.46669	1.41421	0.707107	0.685894	0.0141421	1.41421
				best	87.06	80.32	86.14	82.55	90.74	87.49	91.88	89.36					best	88.18	83.33	85.83	84.46	91.2	90.34	91.4	90.77					best	87.62	81.825	85.985	83.505	90.97	88.915	91.64	90.065					best	0.79196	2.12839	0.219203	1.35057	0.325269	2.01525
	s-1	base	1	31	88.08	82	88	84.93	90.54	88	92	89.81			base	1	31	87.63	80	87	83.31	90.56	86	92	88.64			base	1	31	87.855	81	87.5	84.12	90.55	87	92	89.225			base	1	31	0.318198	1.41421	0.707107	1.14551	0.0141421	1.41421
				63	88.9	84	88	85.88	91.4	90	92	90.84					63	88.46	82	88	84.27	91.46	88	92	89.74					63	88.68	83	88	85.075	91.43	89	92	90.29					63	0.311127	1.41421	0	1.13844	0.0424264	1.41421
				127	88.75	84	85	84.06	92.05	91	91	91.01					127	88.1	81	84	82.18	91.9	89	91	89.6					127	88.425	82.5	84.5	83.12	91.975	90	91	90.305					127	0.459619	2.12132	0.707107	1.32936	0.106066	1.41421
				best	89.34	84.89	88.24	86.33	92.01	91.07	92.41	91.64					best	88.56	81.86	86.78	83.99	91.97	88.7	92.17	90.32					best	88.95	83.375	87.51	85.16	91.99	89.885	92.29	90.98					best	0.551543	2.14253	1.03238	1.65463	0.0282843	1.67584
	s0	zero-level		best	87.86	83.65	84.88	84.09	90.7	90.39	90.34	90.29					best	87.99	83.55	84.53	83.76	91.23	90.91	90.42	90.57					best	87.925	83.6	84.705	83.925	90.965	90.65	90.38	90.43					best	0.0919239	0.0707107	0.247487	0.233345	0.374767	0.367696
			0.1	best	85.54	80.37	84.22	82.05	88.16	85.76	88.4	86.93					best	86.63	81.07	86.55	83.05	89.29	86.11	90.78	87.99
[truncated: 2 more columns]
